# Supplementary material for: Differentiation of multi-metal ions based on fluorescent dual-emission carbon nanodots
Source: Royal Society of Chemistry journal article supplement (doi:10.1039/c5ra16373k), 2015-01-01
Supplement: c5ra16373k1.pdf [file c5ra16373k1.pdf]

**Supplementary Information for**  
**Differentiation of multi-metal ions based on Fluorescent**  
**Dual-Emission Carbon Nanodots**

Fei Qu<sup>a,b,1\*</sup>, Shuai Wang<sup>a,b,1</sup>, Dongya Liu<sup>a,b</sup>, Jinmao You<sup>a,b,c,\*</sup>

<sup>a</sup> The Key Laboratory of Life-Organic Analysis, Qufu Normal University, Qufu 273165, Shandong, China

<sup>b</sup> Key Laboratory of Pharmaceutical Intermediates and Analysis of Natural Medicine, Qufu Normal University, Qufu 273165, Shandong, China

<sup>c</sup> Northwest Institute of Plateau Biology, Chinese Academy of Sciences, Xining 810001, China

\*Corresponding authors at: Qufu Normal University, Key Laboratory of Pharmaceutical Intermediates and Analysis of Natural Medicine, Qufu, China.

Tel.: +86 537 4456305; Fax: +86 537 4456305.

E-mail addresses:

qufei3323@163.com (F. Qu)

jmyou6304@163.com (J. You).

<sup>1</sup> Fei Qu and Shuai Wang contributed equally to this work

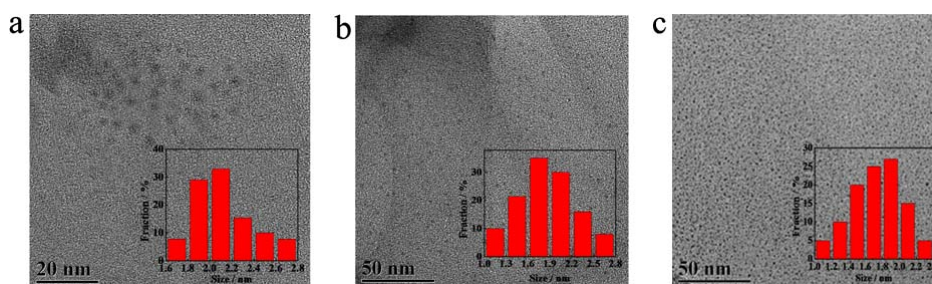

**Figure S1.** TEM images of DECNDs synthesized in other alcohol-water binary systems (a, methanol-water; b, ethanol-water; c, ethylene glycol-water). The diameters of DECNDs synthesized in other alcohol-water binary systems were 2.2 nm for methanol-water, 1.8 nm for ethanol-water, and 1.81 nm for ethylene glycol -water.

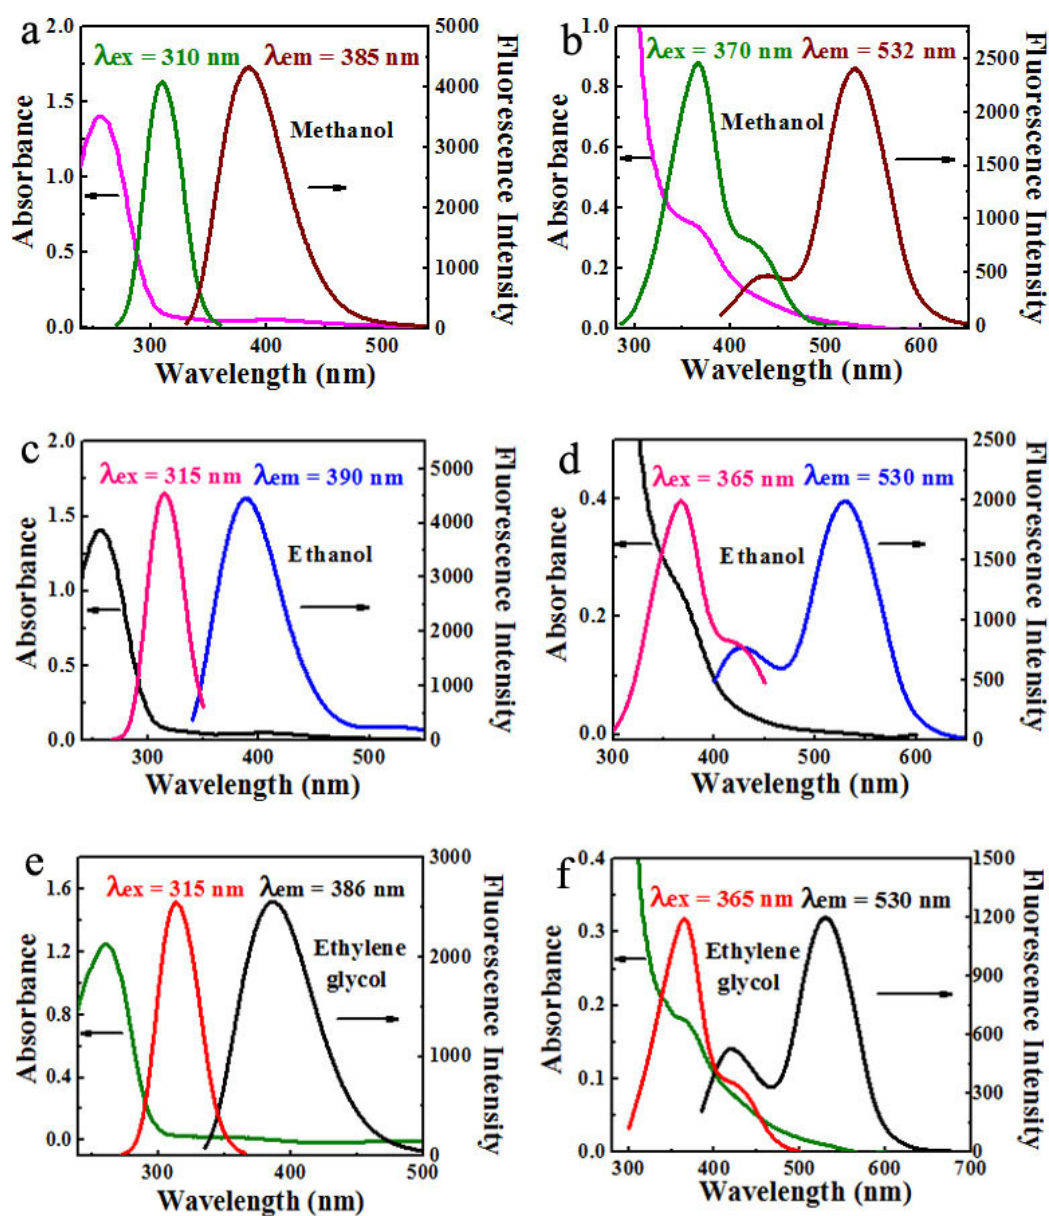

**Figure S2.** UV-vis absorption and fluorescence spectra of blue emitters (a, c, e) and yellow emitters (b, d, f) synthesized in other alcohol-water binary systems (a, b: methanol-water; c, d: ethanol-water; e, f: ethylene glycol-water).

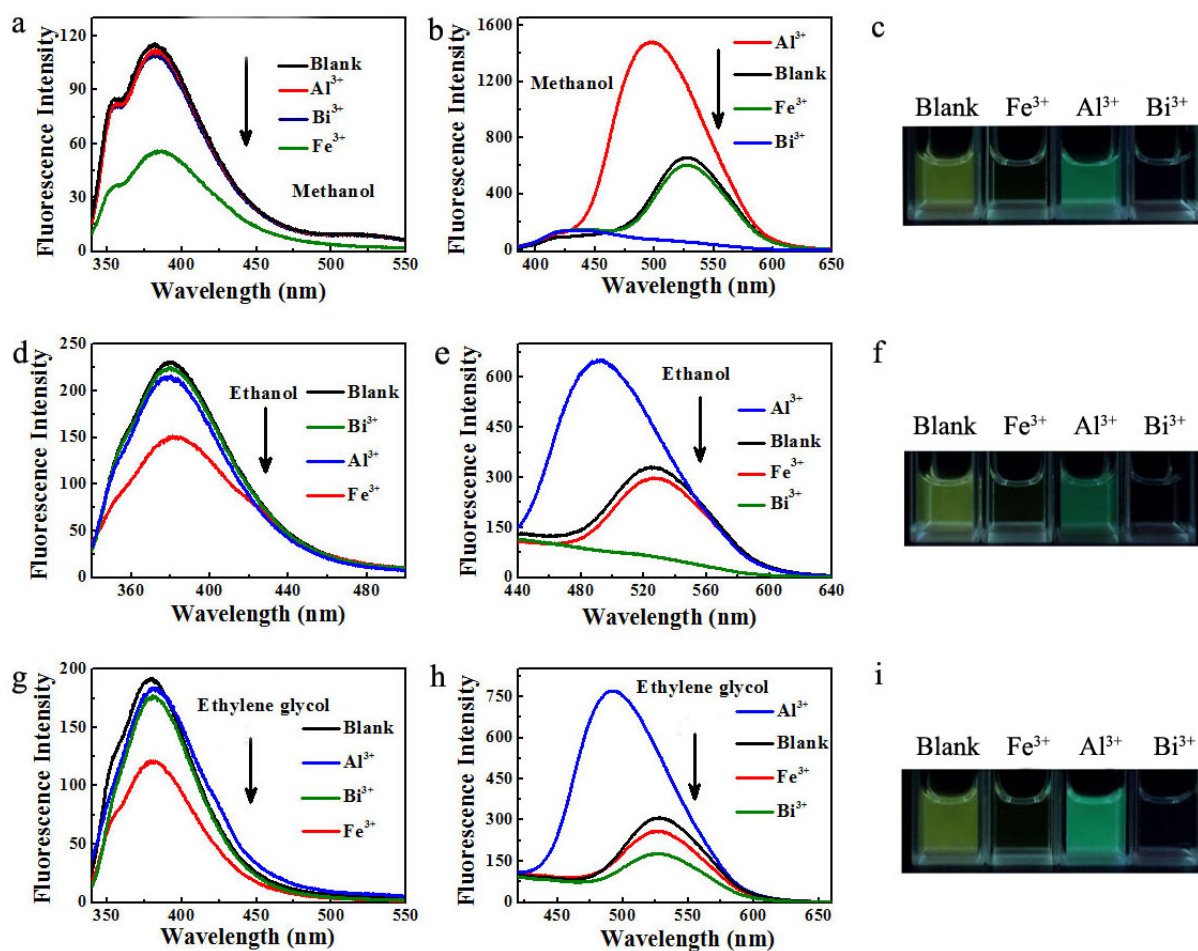

**Figure S3.** Fluorescence spectra (a, d, g, blue emitters; b, e, h, yellow emitters) and the fluorescence color changes of DECNDs synthesized in other alcohol-water binary systems with the addition of  $\text{Fe}^{3+}$ ,  $\text{Al}^{3+}$  and  $\text{Bi}^{3+}$  under UV light at 365 nm (c, f and i). a, b and c was DECNDs synthesized in methanol-water system; d, e and f was DECNDs synthesized in ethanol-water system; g, h and i was DECNDs synthesized in ethylene glycol-water system. Concentrations: a,  $\text{Fe}^{3+}$ ,  $\text{Bi}^{3+}$  and  $\text{Al}^{3+}$  were 100  $\mu\text{M}$ ; b, c, e, f, h and i,  $\text{Fe}^{3+}$  was 100  $\mu\text{M}$ , and  $\text{Bi}^{3+}$  /  $\text{Al}^{3+}$  was 30  $\mu\text{M}$ ; d and g,  $\text{Fe}^{3+}$  was 50  $\mu\text{M}$ , and  $\text{Bi}^{3+}$  /  $\text{Al}^{3+}$  was 100  $\mu\text{M}$ .

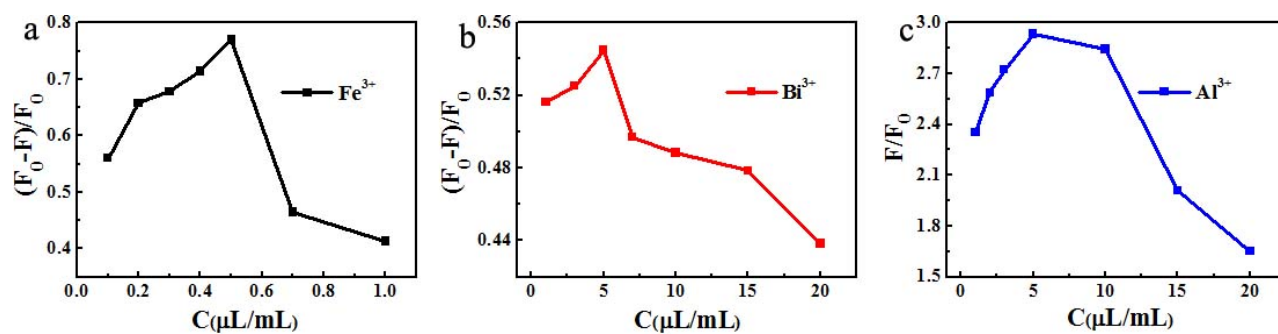

**Figure S4.** The influence of probe concentration on the detection of  $\text{Fe}^{3+}$  (a, 200  $\mu\text{M}$ ),  $\text{Bi}^{3+}$  (b, 20  $\mu\text{M}$ ) and  $\text{Al}^{3+}$  (c, 30  $\mu\text{M}$ ).

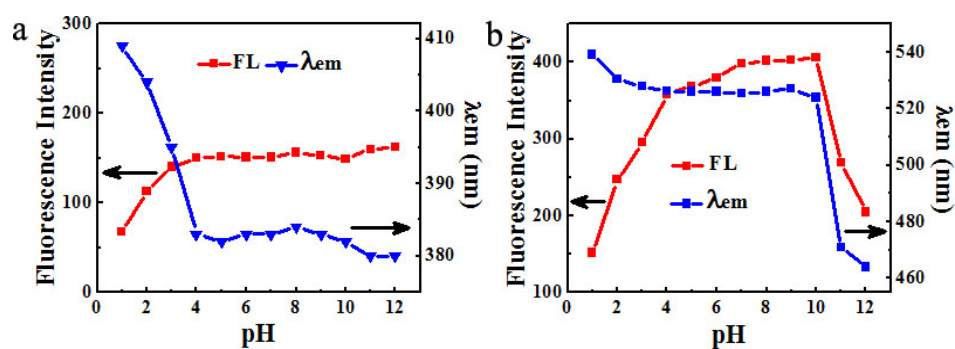

**Figure S5.** Influence of pH values on the fluorescence of DECNDs. The different pH values were adjusted by adding HCl or NaOH from pH 1 to 12 (a, blue emitters; b, yellow emitters).

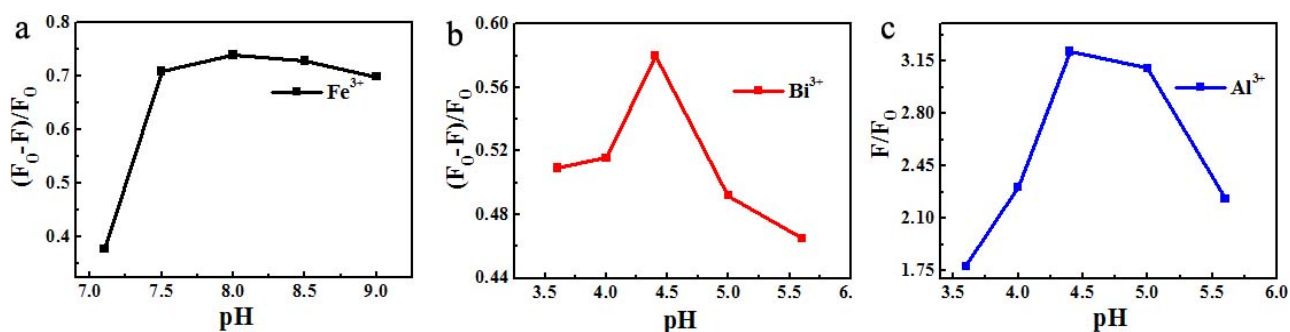

**Figure S6.** The influence of pH values on the detection of  $\text{Fe}^{3+}$ ,  $\text{Bi}^{3+}$  and  $\text{Al}^{3+}$  (a, the concentration of  $\text{Fe}^{3+}$  was 200  $\mu\text{M}$  in 0.1 M Tris-Hcl buffer; b, the concentration of  $\text{Bi}^{3+}$  was 20  $\mu\text{M}$  in 0.2 M HAC-NaAC; c, the concentration of  $\text{Al}^{3+}$  was 30  $\mu\text{M}$  in 0.2 M HAC-NaAC).

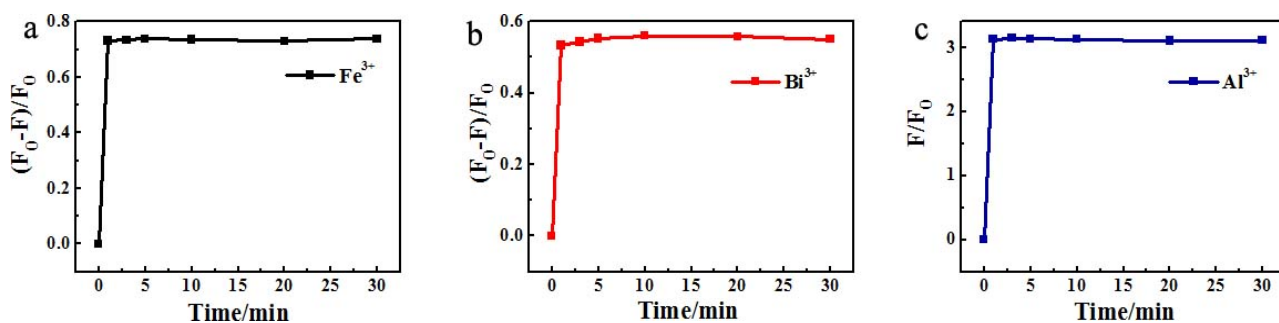

**Figure S7.** The influence of reaction time on the detection of  $\text{Fe}^{3+}$ ,  $\text{Bi}^{3+}$  and  $\text{Al}^{3+}$  (a, 200  $\mu\text{M}$   $\text{Fe}^{3+}$ ; b, 20  $\mu\text{M}$   $\text{Bi}^{3+}$ ; c, 30  $\mu\text{M}$   $\text{Al}^{3+}$ ).

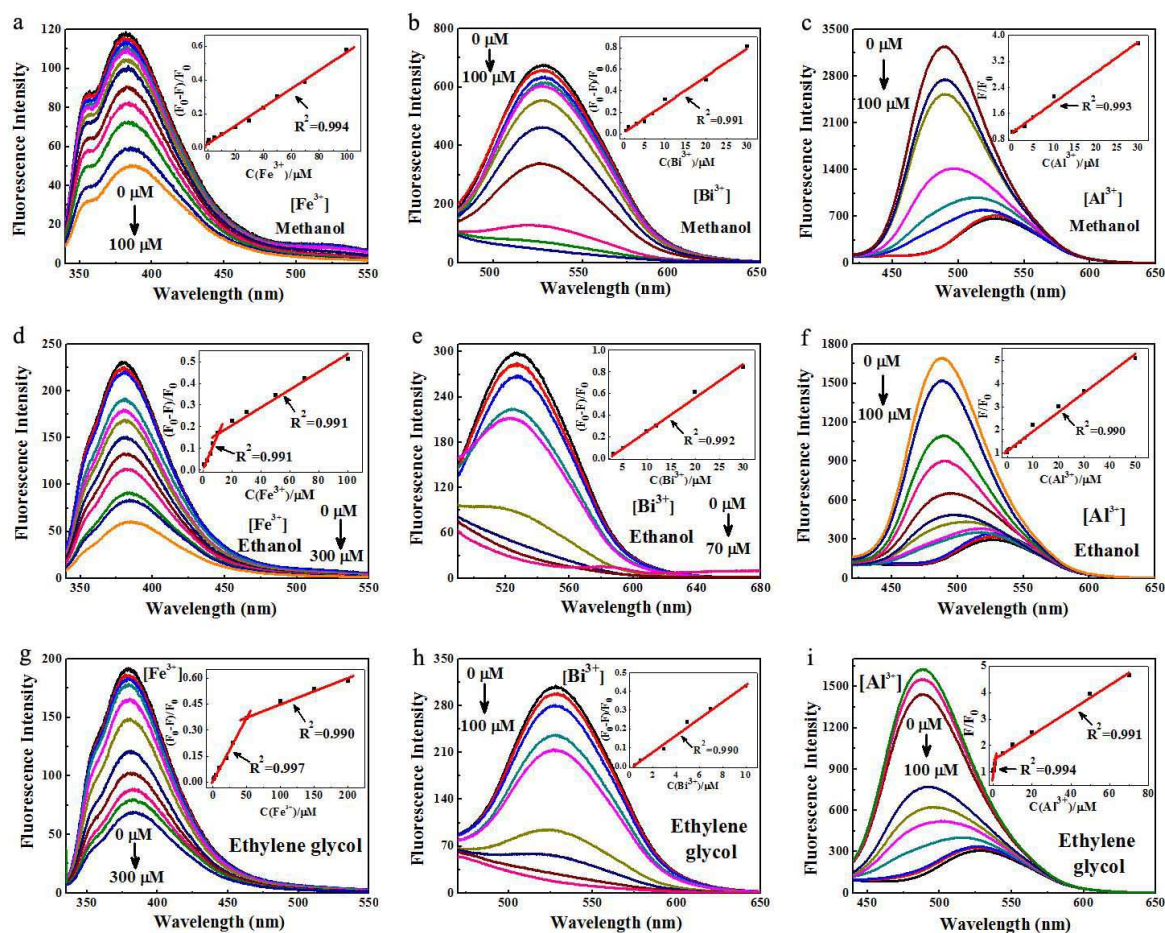

**Figure S8.** Fluorescence spectra of DECNDs synthesized in other alcohol-water binary systems (a, b and c: methanol-water; d, e and f: ethanol-water; g, h and i: ethylene glycol-water) with addition of various amounts of  $\text{Fe}^{3+}$ ,  $\text{Bi}^{3+}$  and  $\text{Al}^{3+}$  and the corresponding linear ranges (inset).

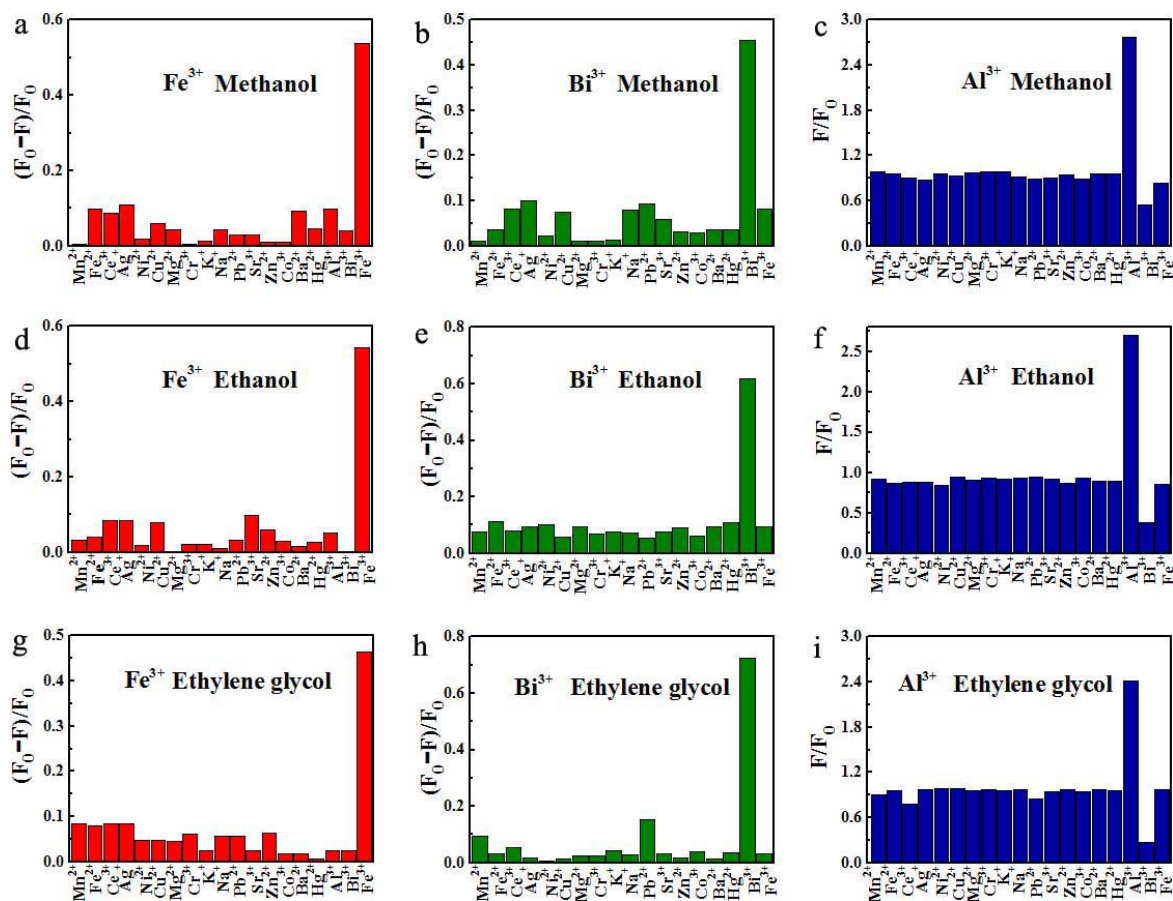

**Figure S9.** Selectivity of DECNDs synthesized in other alcohol-water binary systems for the detection of  $\text{Fe}^{3+}$ ,  $\text{Bi}^{3+}$  and  $\text{Al}^{3+}$  (a, b and c, methanol-water; d, e and f, ethanol-water; g, h and i, ethylene glycol-water): a, d and g, the concentrations of all the metal ions were 100  $\mu\text{M}$ ; b, e and h, the concentrations of  $\text{Ce}^{3+}$ ,  $\text{Mg}^{2+}$ ,  $\text{Sr}^{2+}$ ,  $\text{Zn}^{2+}$ ,  $\text{Fe}^{2+}$ ,  $\text{Cu}^{2+}$ ,  $\text{Ni}^{2+}$ ,  $\text{Ag}^+$ ,  $\text{Co}^{2+}$  were 50  $\mu\text{M}$  and  $\text{Cr}^{3+}$ ,  $\text{Na}^+$ ,  $\text{Mn}^{2+}$ ,  $\text{K}^+$ ,  $\text{Ba}^{2+}$ ,  $\text{Pb}^{2+}$ ,  $\text{Hg}^{2+}$  were 100  $\mu\text{M}$ , except for  $\text{Bi}^{3+}$  was 20  $\mu\text{M}$ ; c, f and i, the concentrations of  $\text{Al}^{3+}$  and  $\text{Bi}^{3+}$  were 20  $\mu\text{M}$  and other metal ions were 100  $\mu\text{M}$ .

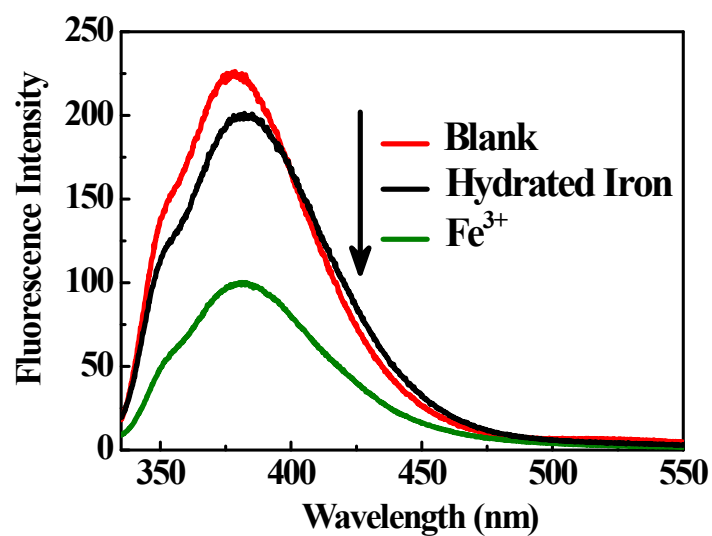

**Figure S10.** Fluorescence spectra of DECNDs in absence (blank) and presence of  $\text{Fe}^{3+}$  and hydrated iron. The concentrations of  $\text{Fe}^{3+}$  and hydrated iron were  $100\ \mu\text{M}$ .

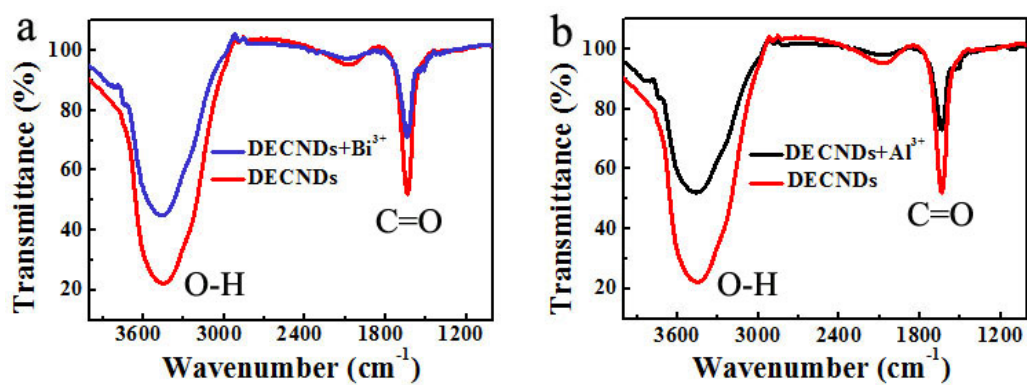

**Figure S11.** FT-IR spectra of the DECNDs in absence and presence of  $\text{Bi}^{3+}$  (a), and  $\text{Al}^{3+}$  (b).

**Table S1.** Comparison of linear ranges and LODs of Fe<sup>3+</sup>, Bi<sup>3+</sup> and Al<sup>3+</sup> by DECNDs synthesized in alcohol-water binary systems.

| Alcohol-water binary systems | Metal ions       | Linear range              | Excitation wavelength | LOD    |
|------------------------------|------------------|---------------------------|-----------------------|--------|
| methanol-water               | Fe <sup>3+</sup> | 0.5 $\mu$ M - 100 $\mu$ M | 315 nm                | 150 nM |
|                              | Bi <sup>3+</sup> | 0.5 $\mu$ M - 30 $\mu$ M  | 365 nm                | 220 nM |
|                              | Al <sup>3+</sup> | 0.1 $\mu$ M - 30 $\mu$ M  | 365 nm                | 60 nM  |
| ethanol-water                | Fe <sup>3+</sup> | 1 $\mu$ M - 100 $\mu$ M   | 315 nm                | 771 nM |
|                              | Bi <sup>3+</sup> | 3 $\mu$ M - 30 $\mu$ M    | 365 nm                | 710 nM |
|                              | Al <sup>3+</sup> | 0.01 $\mu$ M - 50 $\mu$ M | 365 nm                | 4 nM   |
| n-propanol-water             | Fe <sup>3+</sup> | 0.5 $\mu$ M - 250 $\mu$ M | 315 nm                | 200 nM |
|                              | Bi <sup>3+</sup> | 0.5 $\mu$ M - 30 $\mu$ M  | 365 nm                | 150 nM |
|                              | Al <sup>3+</sup> | 0.3 $\mu$ M - 30 $\mu$ M  | 365 nm                | 100 nM |
| ethylene glycol-water        | Fe <sup>3+</sup> | 1 $\mu$ M - 200 $\mu$ M   | 315 nm                | 300 nM |
|                              | Bi <sup>3+</sup> | 0.5 $\mu$ M - 10 $\mu$ M  | 365 nm                | 200 nM |
|                              | Al <sup>3+</sup> | 0.05 $\mu$ M - 70 $\mu$ M | 365 nm                | 20 nM  |
